# Supplementary material for: HMGCS2 is a key ketogenic enzyme potentially involved in type 1 diabetes with high cardiovascular risk
Source: PubMed Central journal article supplement (PMC5496911; doi:10.1038/s41598-017-04469-z), 2017-07-04

## **Supplementary figures**

### **HMGCS2 is a key ketogenic enzyme potentially involved in Type 1 diabetes with high cardiovascular risk.**

Sanket Kumar Shukla<sup>1a</sup>, Weijing Liu<sup>1b</sup>, Kunal Sikder<sup>a</sup>, Sankar Addya<sup>c</sup>, Amrita Sarkar<sup>a</sup>, Yidong Wei<sup>d</sup>, Khadija Rafiq<sup>a\*</sup>

Department of Medicine, Center of Translational Medicine, Thomas Jefferson University, Philadelphia, PA-19107, USA. <sup>a</sup>

Internal Medicine-Cardiovascular Department, Shanghai Tenth People's Hospital Middle of Yanchang Road, Zhabei district, Shanghai, China. <sup>b</sup>

Kimmel Cancer Centre, Thomas Jefferson University, Philadelphia, PA-19107, USA. <sup>c</sup>

Department of Cardiology, Shanghai Tenth People's Hospital of Tongji University 301 Yanchang Road, Shanghai, China. <sup>d</sup>

#### **\* Corresponding author**

Khadija Rafiq, PhD

Assistant Professor

Center for Translational Medicine, Department of Medicine

Thomas Jefferson University, Rm 543A Jefferson Alumni Hall

1020 Locust Street

Philadelphia, PA 19107

215-503-5593

Khadija.Rafiq@jefferson.edu

**Figure S1: The 2<sup>nd</sup> most top network, with an IPA score of 7. Cellular Development, Hematological System Development and Function, Hematopoiesis**

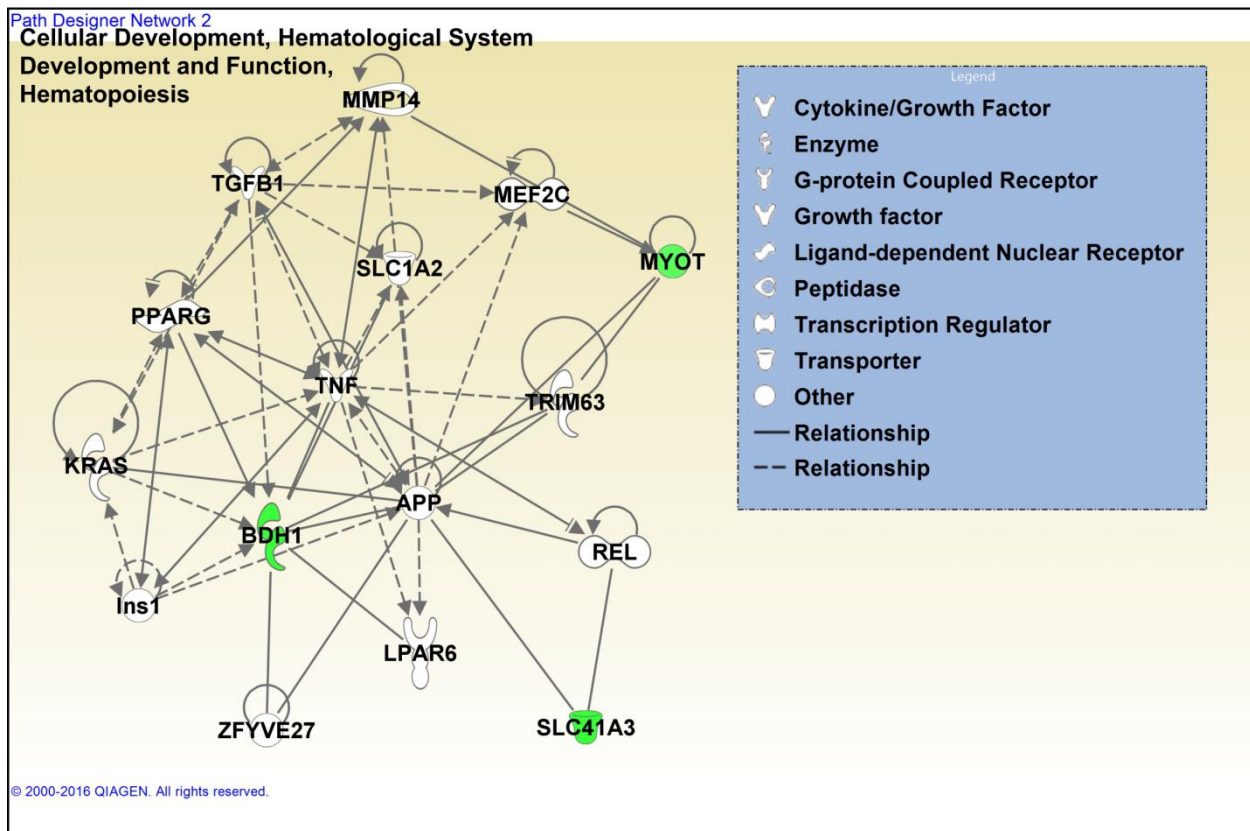

Figure S2:  $\beta$ -hydroxy butyrate level (ketone bodies) in serum sample of mice model.

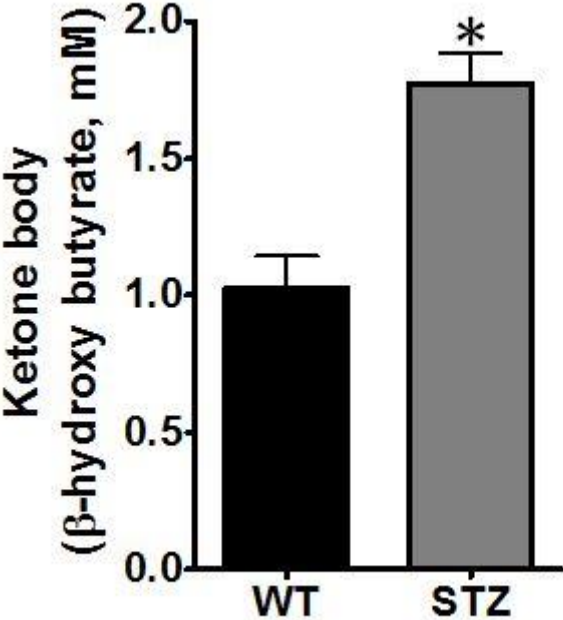

Supplement: 41598_2017_4469_MOESM1_ESM.pdf [file 41598_2017_4469_MOESM1_ESM.pdf]
